# Supplementary material for: Cardioprotective effects of polydatin against myocardial injury in diabetic rats via inhibition of NADPH oxidase and NF-κB activities
Source: PubMed Central journal article supplement (PMC7733248; doi:10.1186/s12906-020-03177-y), 2020-12-11

### Original uncropped western-blot images

**Figure 4F: NOX2 protein.** Western blot was performed on the hearts of control or diabetic rats treated with either polydatin (90 mg/kg/day) or vehicle for 8 weeks. 1st—4th lane: CON, CON+PD, DM, DM+PD. Observed band size: 67 kDa.

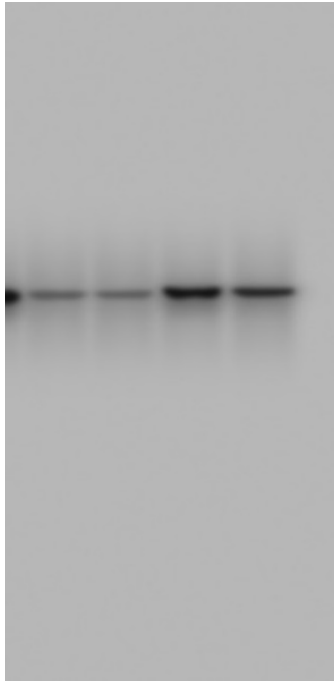

**Figure 4F: NOX4 protein.** Western blot was performed on the hearts of control or diabetic rats treated with either polydatin (90 mg/kg/day) or vehicle for 8 weeks. 1st—4th lane: CON, CON+PD, DM, DM+PD. Observed band size: 65 kDa.

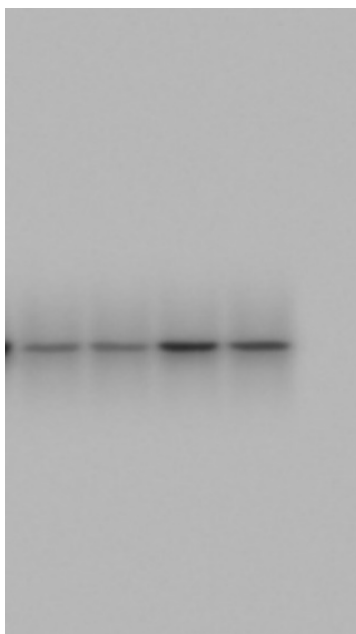

**Figure 4F: NOX1 protein.** Western blot was performed on the hearts of control or diabetic rats treated with either polydatin (90 mg/kg/day) or vehicle for 8 weeks. 1st—4th lane: CON, CON+PD, DM, DM+PD. Observed band size: 65 kDa.

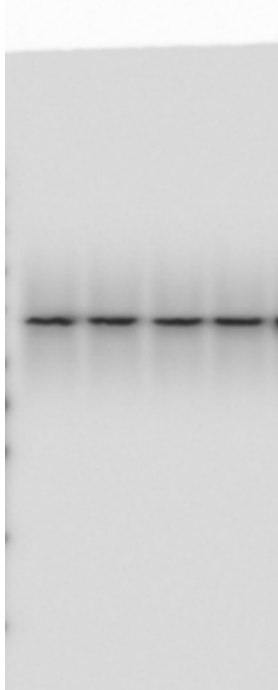

**Figure 4F: GAPDH protein.** Western blot was performed on the hearts of control or diabetic rats treated with either polydatin (90 mg/kg/day) or vehicle for 8 weeks. 1st—4th lane: CON, CON+PD, DM, DM+PD. Observed band size: 40 kDa.

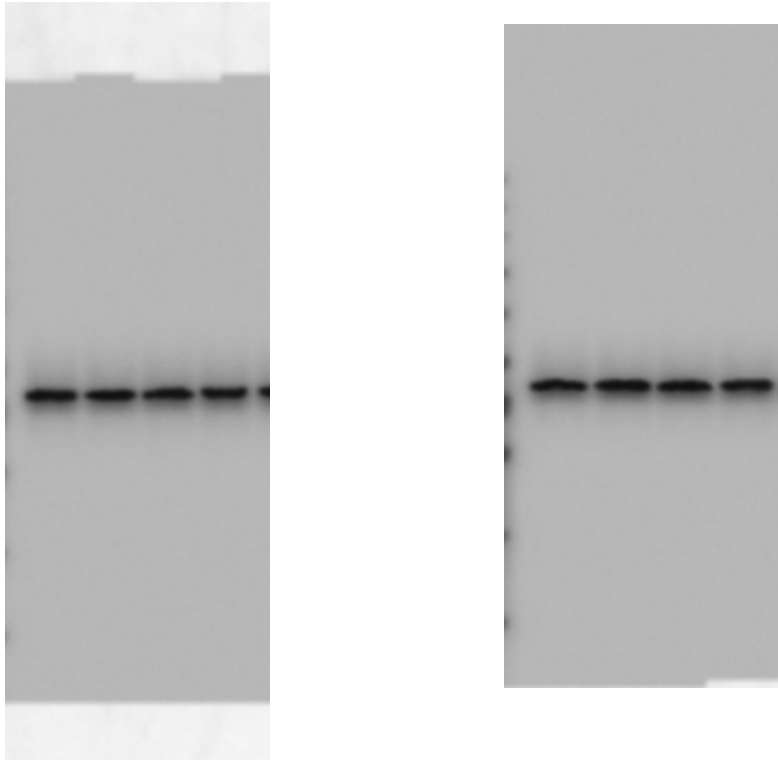

**Figure 5A: Phosphorylation of I $\kappa$ B- $\alpha$  protein.** Western blot was performed on the hearts of control or diabetic rats treated with either polydatin (90 mg/kg/day) or vehicle for 8 weeks. 1st—4th lane: CON, CON+PD, DM, DM+PD. Observed band size: 85 kDa.

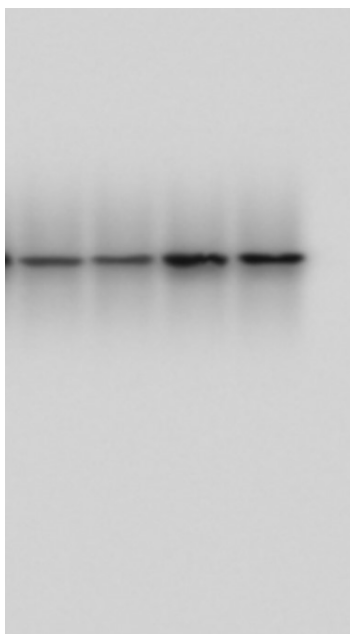

**Figure 5A: I $\kappa$ B- $\alpha$  protein.** Western blot was performed on the hearts of control or diabetic rats treated with either polydatin (90 mg/kg/day) or vehicle for 8 weeks. 1st—4th lane: CON, CON+PD, DM, DM+PD. Observed band size: 85 kDa.

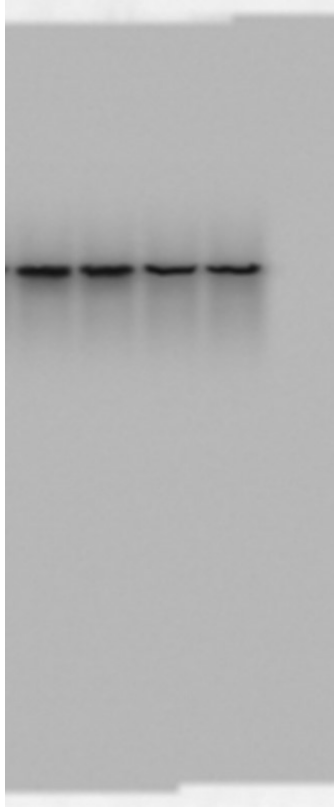

**Figure 5A: GAPDH protein.** Western blot was performed on the hearts of control or diabetic rats treated with either polydatin (90 mg/kg/day) or vehicle for 8 weeks. 1st—4th lane: CON, CON+PD, DM, DM+PD. Observed band size: 65 kDa.

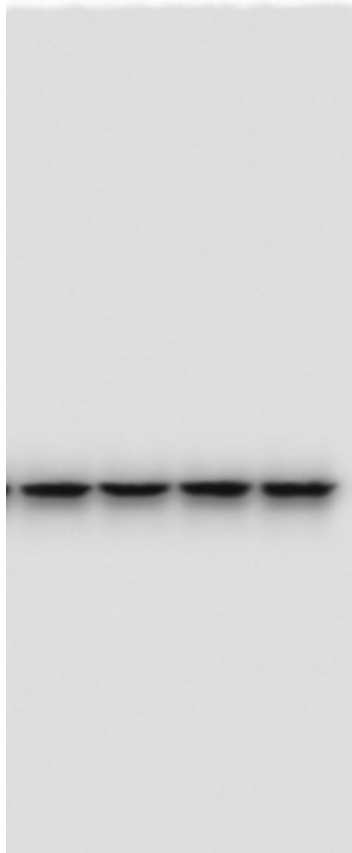

**Figure 5A: p65 protein.** Western blot was performed on the hearts of control or diabetic rats treated with either polydatin (90 mg/kg/day) or vehicle for 8 weeks. 1st—4th lane: CON, CON+PD, DM, DM+PD. Observed band size: 65 kDa.

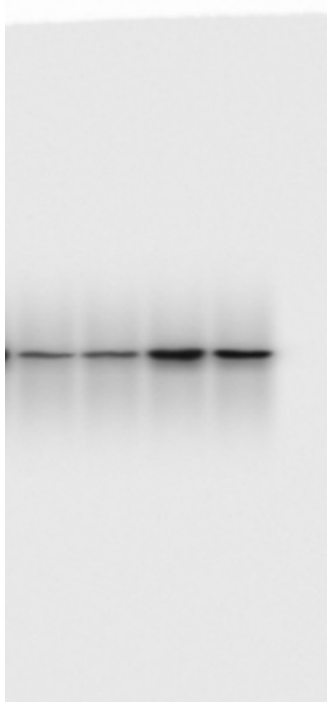

**Figure 5A: Histone protein.** Western blot was performed on the hearts of control or diabetic rats treated with either polydatin (90 mg/kg/day) or vehicle for 8 weeks. 1st—4th lane: CON, CON+PD, DM, DM+PD. Observed band size: 15 kDa.

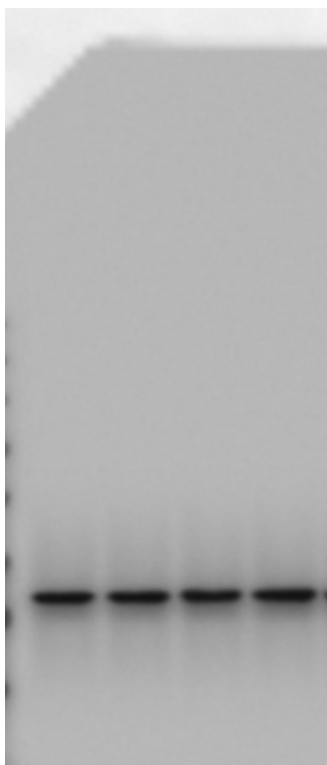

**Figure 7G: Phosphorylation of I $\kappa$ B- $\alpha$  protein in the cytoplasm of H9c2 cells.** H9c2 cells were cultured in DMEM containing 30 mmol/L glucose (HG) or 5.5 mmol/L glucose (normal glucose) and treated with polydatin (40  $\mu$ mol/L), DPI (a NADPH oxidase inhibitor, 10 $\mu$ mol/L) or polydatin (40  $\mu$ mol/L) +DPI (10 $\mu$ mol/L) for 24 h. 1st—4th lane: CON,CON+DPI,CON+PD CON+DPI+PD; 5th—8<sup>th</sup> lane: HG,HG+DPI,HG+PD HG+DPI+PD. Observed band size: 85kDa.

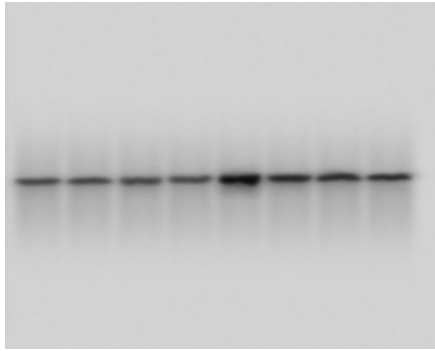

**Figure 7G: I $\kappa$ B- $\alpha$  protein in the cytoplasm of H9c2 cells.** H9c2 cells were cultured in DMEM containing 30 mmol/L glucose (HG) or 5.5 mmol/L glucose (normal glucose) and treated with polydatin (40  $\mu$ mol/L), DPI (a NADPH oxidase inhibitor, 10 $\mu$ mol/L) or polydatin (40  $\mu$ mol/L) +DPI (10 $\mu$ mol/L) for 24 h. 1st—4th lane: CON,CON+DPI,CON+PD CON+DPI+PD; 5th—8th lane: HG,HG+DPI,HG+PD HG+DPI+PD. Observed band size: 85kDa.

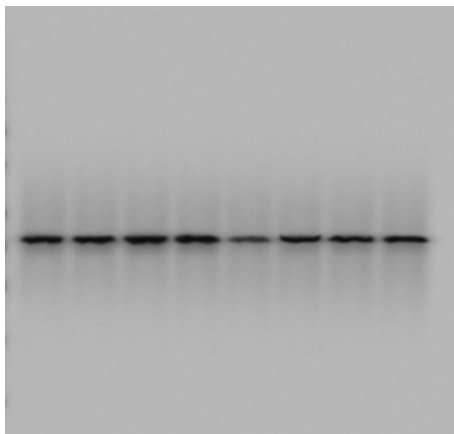

**Figure 7G: GAPDH protein in the cytoplasm of H9c2 cells.** H9c2 cells were cultured in DMEM containing 30 mmol/L glucose (HG) or 5.5 mmol/L glucose (normal glucose) and treated with polydatin (40  $\mu$ mol/L), DPI (a NADPH oxidase inhibitor, 10 $\mu$ mol/L) or polydatin (40  $\mu$ mol/L) +DPI (10 $\mu$ mol/L) for 24 h. 1st—4th lane: CON,CON+DPI,CON+PD CON+DPI+PD; 5th—8th lane: HG,HG+DPI,HG+PD HG+DPI+PD. Observed band size: 40kDa.

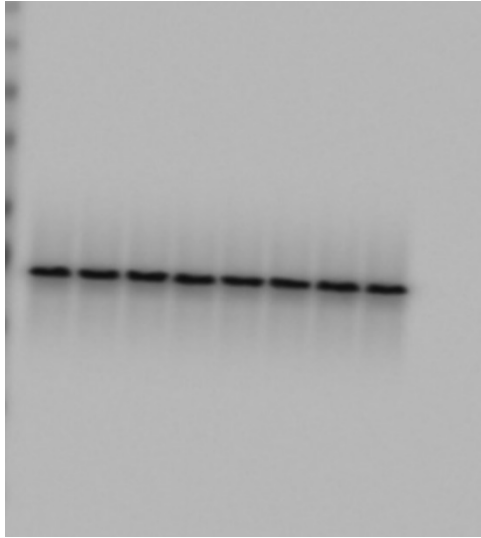

**Figure 7G: p65 protein in nucleus of H9c2 cells.** H9c2 cells were cultured in DMEM containing 30 mmol/L glucose (HG) or 5.5 mmol/L glucose (normal glucose) and treated with polydatin (40  $\mu$ mol/L), DPI (a NADPH oxidase inhibitor, 10 $\mu$ mol/L) or polydatin (40  $\mu$ mol/L) +DPI (10 $\mu$ mol/L) for 24 h. 1st—4th lane: CON,CON+DPI,CON+PD CON+DPI+PD; 5th—8th lane: HG,HG+DPI,HG+PD HG+DPI+PD. Observed band size: 65kDa.

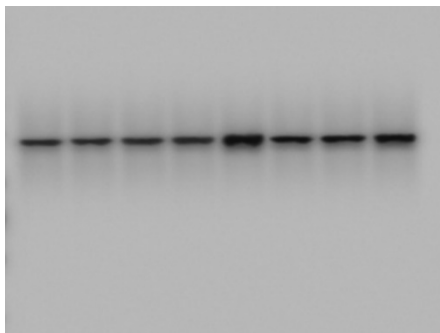



**Figure 7G: Histone protein in nucleus of H9c2 cells.** H9c2 cells were cultured in DMEM containing 30 mmol/L glucose (HG) or 5.5 mmol/L glucose (normal glucose) and treated with polydatin (40  $\mu\text{mol/L}$ ), DPI (a NADPH oxidase inhibitor, 10 $\mu\text{mol/L}$ ) or polydatin (40  $\mu\text{mol/L}$ ) +DPI (10 $\mu\text{mol/L}$ ) for 24 h. 1st—4th lane: CON,CON+DPI,CON+PD CON+DPI+PD; 5th—8th lane: HG,HG+DPI,HG+PD HG+DPI+PD. Observed band size: 15kDa.

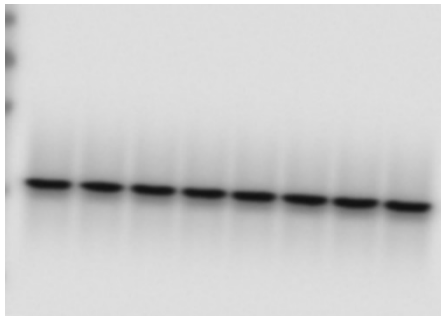

Supplement: 12906_2020_3177_MOESM1_ESM.pdf [file 12906_2020_3177_MOESM1_ESM.pdf]
